# Supplementary material
Source: publisher figshare collection journal article supplement (https://acs.figshare.com/ndownloader/files/4139767)
Supplement: Supplementary file 1 [file 4139767]

## Supplementary data

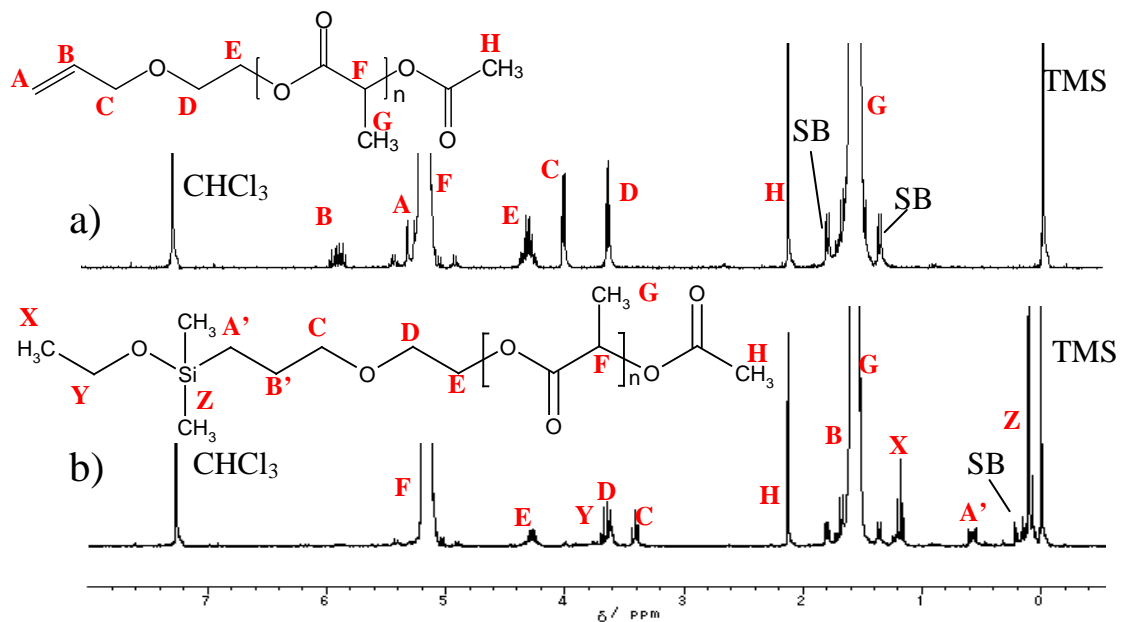

Enlarged 300 MHz <sup>1</sup>H NMR spectra of a) A-ac-PDLA(7.4) and b) Si-PDLA(7.0). The signals labeled by SB are satellite bands.
